# Supplementary material
Source: Springer Nature journal article supplement (https://www.springermedizin.de/resource/supplementary/12879_2011_1993_MOESM1_ESM.pdf/9443322)

% of macrolide-resistant *M. pneumoniae*

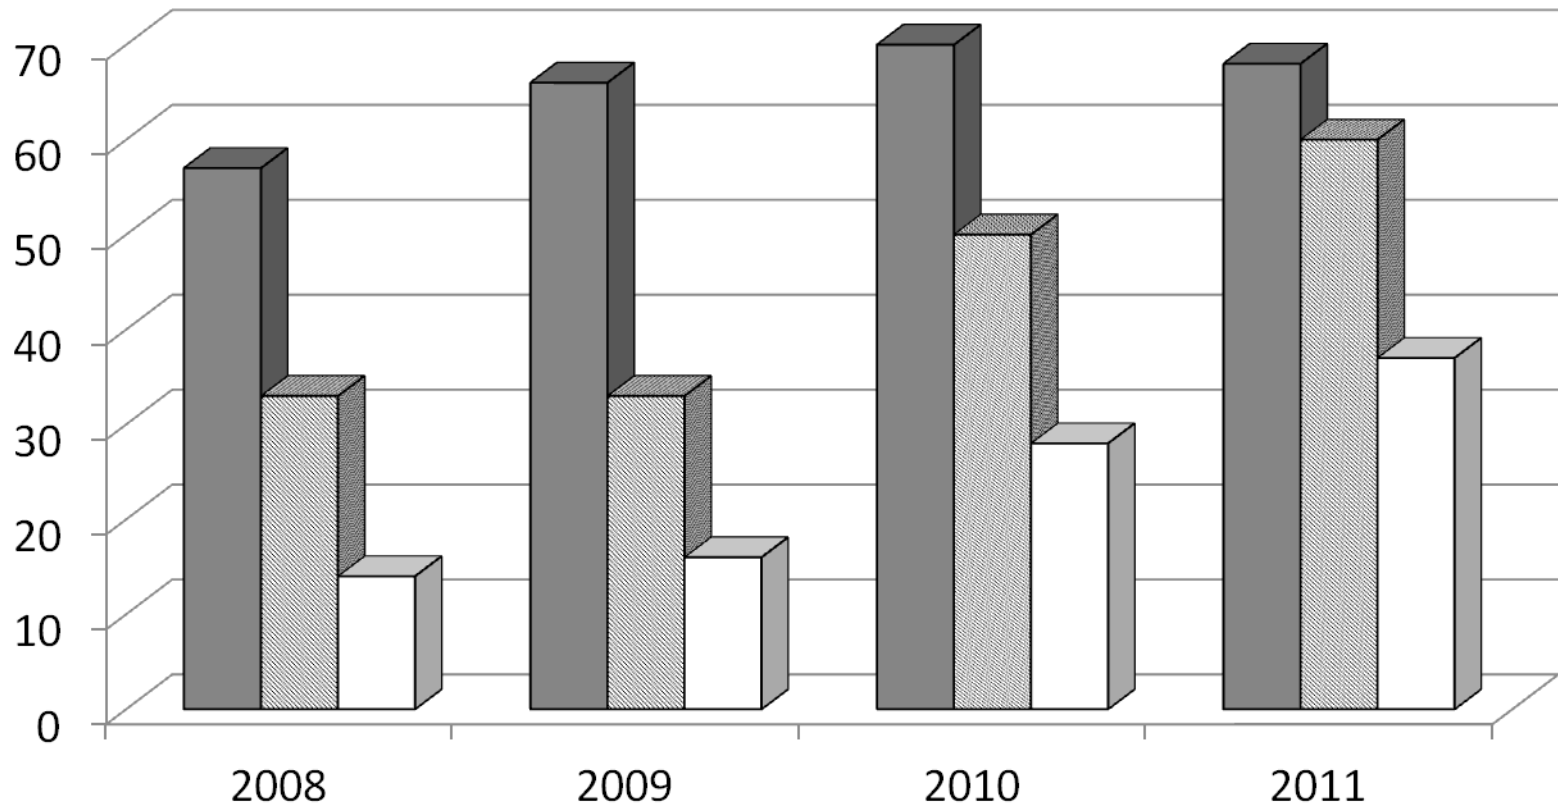

year

Supplement: MOESM1 [file 9443322]
